# Supplementary material for: Genetic and morphological analyses indicate that the Australian endemic scorpion Urodacus yaschenkoi (Scorpiones: Urodacidae) is a species complex
Source: PeerJ. 2017 Jan 17;5:e2759. doi: 10.7717/peerj.2759 (PMC5244882; doi:10.7717/peerj.2759)
Supplement: Supplemental Information 1 — Supplemental File 1. Pairwise uncorrected p-distance between 31 unique U. yaschenkoi haplotypes and three outgroup haplotypes (U. novaehollandiae and two U. manicatus). Haplotypes were generated from the concatenated partial sequences of COXI and 16S loci. Supplemental File 2. Pairwise uncorrected p-distance between 13 unique U. yaschenkoi haplotypes generated from the partial 28S sequence. Supplemental File 3. List of haplotype numbers assigned to the U. yaschenkoi samples. Supplemental File 4. Measures (in mm) of seven morphological traits in 39 U. yaschenkoi adult females. [file peerj-05-2759-s001.xlsx]

## Sheet: Add. File 1
Additional File 1. Pairwise uncorrected p-distance between 31 unique U. yaschenkoi haplotypes and three outgroup haplotypes (U. novaehollandiae and two U. manicatus). Haplotypes were generated from the concatenated partial sequences of COI and 16S loci.
	1	2	3	4	5	6	7	8	9	10	11	12	13	14	15	16	17	18	19	20	21	22	23	24	25	26	27	28	29	30	31	Un2111	Um1814
1
2	0.0035
3	0.0035	0.0035
4	0.0037	0.0073	0.0073
5	0.007	0.007	0.007	0.0073
6	0.0096	0.0058	0.0058	0.0101	0.0096
7	0.0037	0.0037	0	0.0073	0.0073	0.006
8	0.0157	0.0157	0.0157	0.0183	0.0158	0.0231	0.0147
9	0.0088	0.0088	0.0088	0.011	0.0088	0.0135	0.0073	0.0141
10	0.0053	0.0053	0.0053	0.0073	0.0053	0.0116	0.0037	0.0141	0.0035
11	0.007	0.007	0.007	0.0092	0.007	0.0135	0.0055	0.0158	0.0053	0.0018
12	0.0106	0.0106	0.0106	0.0128	0.0141	0.0173	0.0092	0.0158	0.0123	0.0088	0.0106
13	0.0123	0.0123	0.0123	0.0147	0.0123	0.0193	0.011	0.0141	0.0141	0.0106	0.0123	0.0018
14	0.0106	0.0106	0.0106	0.0147	0.0141	0.0173	0.011	0.0194	0.0158	0.0123	0.0141	0.0035	0.0053
15	0.0158	0.0158	0.0158	0.0183	0.0194	0.0212	0.0147	0.0194	0.0176	0.0141	0.0158	0.0088	0.0106	0.0123
16	0.0332	0.0332	0.0332	0.0385	0.0335	0.0424	0.0349	0.028	0.0352	0.0352	0.037	0.0299	0.0282	0.0299	0.0264
17	0.035	0.035	0.035	0.0404	0.0352	0.0443	0.0367	0.0297	0.037	0.037	0.0387	0.0317	0.0299	0.0317	0.0282	0.0052
18	0.016	0.016	0.016	0.02	0.02	0.0222	0.016	0.024	0.016	0.016	0.018	0.01	0.012	0.012	0.014	0.0341	0.0361
19	0.0141	0.0141	0.0141	0.0183	0.0176	0.0212	0.0147	0.0229	0.0194	0.0158	0.0176	0.007	0.0088	0.007	0.0123	0.0299	0.0317	0.008
20	0.0297	0.0262	0.0297	0.0312	0.0282	0.0289	0.0275	0.0297	0.0282	0.0282	0.0299	0.0264	0.0246	0.0282	0.0229	0.035	0.0367	0.0361	0.0317
21	0.0286	0.0248	0.0286	0.0302	0.0269	0.0289	0.0262	0.0286	0.0288	0.0269	0.0288	0.025	0.0231	0.0269	0.0231	0.0344	0.0363	0.0342	0.0308	0
22	0.0353	0.0317	0.0353	0.0386	0.0317	0.0367	0.0349	0.0353	0.03	0.03	0.0317	0.0335	0.0317	0.037	0.03	0.0423	0.0441	0.0442	0.0406	0.0106	0.0116
23	0.0299	0.0299	0.0299	0.033	0.0299	0.0385	0.0294	0.0352	0.0282	0.0246	0.0264	0.0299	0.0317	0.0335	0.0264	0.0299	0.0352	0.0361	0.0335	0.0352	0.0346	0.0265
24	0.0158	0.0158	0.0123	0.0183	0.0158	0.0193	0.011	0.0246	0.0141	0.0106	0.0123	0.0194	0.0211	0.0229	0.0211	0.0387	0.0405	0.024	0.0229	0.0352	0.0346	0.0265	0.0176
25	0.0335	0.0299	0.0335	0.0367	0.0299	0.0347	0.033	0.0352	0.0282	0.0282	0.0299	0.0335	0.0317	0.037	0.0264	0.0387	0.0405	0.0381	0.037	0.0141	0.0154	0.0053	0.0211	0.0211
26	0.0176	0.0176	0.0176	0.0202	0.0176	0.025	0.0165	0.0264	0.0158	0.0123	0.0141	0.0176	0.0194	0.0176	0.0194	0.037	0.0387	0.022	0.0211	0.0335	0.0327	0.0247	0.0158	0.0053	0.0194
27	0.0246	0.0246	0.0246	0.0275	0.0211	0.0328	0.0239	0.0229	0.0229	0.0194	0.0211	0.0246	0.0229	0.0282	0.0246	0.0335	0.0352	0.0301	0.0282	0.0299	0.0288	0.0212	0.0158	0.0123	0.0158	0.0106
28	0.0367	0.0367	0.0332	0.0349	0.0282	0.0347	0.0312	0.0332	0.0317	0.0317	0.0335	0.0335	0.0317	0.0352	0.0335	0.0385	0.0402	0.0461	0.0387	0.0262	0.0267	0.0282	0.0352	0.0317	0.0282	0.0335	0.0299
29	0.0629	0.0629	0.0629	0.0697	0.0634	0.0732	0.0661	0.0699	0.0616	0.0616	0.0634	0.0634	0.0651	0.0634	0.0651	0.0629	0.0629	0.0661	0.0616	0.0664	0.0706	0.0653	0.0599	0.0616	0.0634	0.0599	0.0599	0.0647
30	0.0629	0.0629	0.0629	0.0642	0.0634	0.0732	0.0606	0.0629	0.0599	0.0599	0.0616	0.0599	0.0616	0.0616	0.0599	0.0629	0.0647	0.0621	0.0616	0.0717	0.0744	0.0723	0.0616	0.0599	0.0687	0.0581	0.0599	0.0629	0.0699
31	0.0647	0.0647	0.0647	0.0661	0.0651	0.0751	0.0624	0.0647	0.0616	0.0616	0.0634	0.0634	0.0651	0.0651	0.0634	0.0664	0.0647	0.0661	0.0651	0.0734	0.0763	0.0741	0.0634	0.0616	0.0704	0.0599	0.0616	0.0647	0.0682	0.0087
Un2111	0.0982	0.0982	0.0947	0.0982	0.0982	0.0982	0.0947	0.0877	0.0947	0.0947	0.0947	0.0912	0.0947	0.0947	0.0912	0.0947	0.0947	0.0947	0.0912	0.0912	0.0912	0.0947	0.0912	0.0947	0.0912	0.0947	0.0807	0.0877	0.1018	0.0947	0.0982
Um1814	0.0982	0.0982	0.0947	0.0982	0.0912	0.0982	0.0947	0.0877	0.0947	0.0947	0.0947	0.0912	0.0877	0.0947	0.0912	0.0772	0.0772	0.0877	0.0912	0.0877	0.0877	0.0877	0.0912	0.0947	0.0877	0.0947	0.0877	0.0912	0.1053	0.0842	0.0877	0.0807
Um271	0.1018	0.1018	0.0982	0.1018	0.0947	0.1018	0.0982	0.0912	0.0982	0.0982	0.0982	0.0947	0.0912	0.0982	0.0947	0.0947	0.0947	0.0912	0.0947	0.0842	0.0842	0.0842	0.0982	0.0982	0.0842	0.0982	0.0877	0.0947	0.1018	0.0947	0.0982	0.0772	0.0456

## Sheet: Add. File 2
Additonal File 2. Pairwise uncorrected p-distance between 13 unique U. yaschenkoi haplotypes generated from the partial 28S sequence.
	1	2	3	4	5	6	7	8	9	10	11	12	13
1
2	0.001
3	0.0025	0.0025
4	0.0015	0.0015	0.003
5	0.001	0.001	0.0025	0.0005
6	0.0015	0.0015	0.003	0.0019	0.0015
7	0.0034	0.0034	0.0039	0.0029	0.0024	0.0039
8	0.0034	0.0034	0.0039	0.0029	0.0024	0.0039	0.0005
9	0.0049	0.0049	0.0055	0.0044	0.0039	0.0054	0.0044	0.0044
10	0.001	0.001	0.0025	0.0015	0.001	0.0015	0.0034	0.0034	0.0049
11	0.0005	0.0005	0.002	0.001	0.0005	0.001	0.0029	0.0029	0.0044	0.0005
12	0.0034	0.0034	0.004	0.0029	0.0024	0.0039	0.0005	0	0.0044	0.0034	0.0029
13	0.0005	0.0005	0.002	0.001	0.0005	0.001	0.0029	0.0029	0.0044	0.0005	0.001	0.0029

## Sheet: Add. File 3
Additional File 3. List of haplotype numbers assigned to the U. yaschenkoi samples.
original label	mtDNA haplotype	28S haplotype		haplgrp_y	haplgrp_o
1397	2			1	1
1406	1			1	1
1407	1			1	1
1939	3			1	1
2038	3			1	1
2067	3			1	1
Pim1	1	4		1	1
Pim2	1	5		1	1
Pim5	1	4		1	1
Pim6	1	1		1	1
Pim8	1	1		1	1
1403	4			1	1
2054	5			1	1
2055	5			1	1
1399	6			1	1
1400	6			1	1
2133	7			1	1
WAM88	8	13		1	1
2062	9			1	1
2056	10			1	1
2060	11			1	1
2061	11			1	1
2070	12			2	1
2071	13			2	1
2053	14			2	1
1812	15			2	1
WAM46	16	11		3	1
WAM37	17	10		3	1
2076	18			2	1
2073	19			2	1
1412	20			4	1
1415	20			4	1
1416	20			4	1
1823	20			4	1
1825	20			4	1
1831	20			4	1
1834	20			4	1
1835	21			4	1
1837	20			4	1
2120	20			4	1
2126	20			4	1
BKA11	20	1		4	1
BKA12	20	2		4	1
BKA13	20	1		4	1
BKB12	20	1		4	1
BKB8	20	1		4	1
Pop1	20	1		4	1
Pop4	20			4	1
Pop5	20			4	1
1607	22			4	1
1606	23			5	1
1917	24			5	1
2125	25			4	1
2140	26			5	1
WAM18	27	6		5	1
M1	28	3		4	1
M2	28	3		4	1
WAM36	29	9		7	1
WAM38	29	9		7	1
WAM32	30	8		6	2
WAM56	30	7		6	2
WAM20	31	7		6	2
WAM31	31	8		6	2
WAM55	31	7		6	2
WAM75	31	12		6	2

## Sheet: Add. File 4
SAMPLE ID	haplgroup	Carapace L	Met V L	Sting L	Pedipalp L	Chela	Pecten L	Pecten W
1812	1	80	60	69	135	70	55	30
1823	2	52	55	56	108	60	37	20
1824	2	50	54	60	113	63	40	22
1825	2	50	56	61	115	65	45	23
1837	2	55	57	63	111	62	35	17
2056	1	52	59	65	114	62	45	17
1939	1	55	58	62	112	60	38	20
2053	1	62	59	64	107	59	49	21
2070	1	55	58	65	115	65	40	17
2119	2	61	59	66	114	62	44	20
2120	2	56	58	56	115	64	41	17
1412	2	55	63	69	119	64	45	19
1403	1	55	59	60	115	65	37	17
1399	1	53	60	67	115	60	40	21
1400	1	54	59	67	120	66	39	17
1406	1	55	57	58	124	65	34	15
1407	1	53	57	62	118	63	41	17
2062/63	1	62	65	73	123	63	47	22
1838	2	52	52	57	108	59	36	13
2133	1	54	62	67	114	65	39	17
1397	1	52	57	64	110	60	41	19
2140	3	55	60	65	109	60	32	17
1917	3	53	64	64	115	63	34	17
2054	1	54	61	65	121	72	36	22
2055	1	63	62	66	120	67	28	22
2071	1	60	62	66	118	65	41	20
1831	2	62	62	72	125	68	41	15
1834	2	54	52	60	114	64	36	20
1414	2	52	59	61	102	63	42	19
1415	2	55	62	66	118	65	39	17
2060	1	64	67	66	135	70	43	18
2061	1	57	59	65	118	68	47	20
W44818	3	95	85	92	153	73	70	31
W83855	4	62	70	76	112	65	61	23
W85032	4	64	71	73	114	54	65	26
W83875	4	69	73	79	114	55	65	23
W85031	4	68	75	85	118	58	63	22
W83856	4	62	74	80	120	60	60	24
W85020	4	59	79	87	123	63	52	24
